# Supplementary material for: Comparative evaluation of oral microbiologic profile in children with Type 1 Diabetes Mellitus versus healthy controls and its relation to oral health status
Source: Springer Nature journal article supplement (doi:10.1186/s12903-025-06013-2), 2025-05-09
Supplement: MOESM1 [file 12903_2025_6013_MOESM1_ESM.pdf]

# **Comparative Evaluation of Oral Microbiologic Profile in Children with Type 1 Diabetes Mellitus Versus Healthy Controls and Its Relation to Oral Health Status**

**Wedad M. Nageeb<sup>1\*</sup>, Asmaa Ali Emam Abo-Elsoud <sup>2</sup>, Mona Kareem Amin <sup>3</sup>, Tarek Mohamed Nabil Mohamed Kamel Mahmoud <sup>2</sup>, Noha El-Sayed Fathi Abdou <sup>4</sup>**

<sup>1</sup>Department of Medical Microbiology and Immunology, Faculty of Medicine, Suez Canal University, Ismailia, Egypt

<sup>2</sup>Department of Pediatric Dentistry, Preventive Dentistry and Dental Public Health, Faculty of Dentistry, Suez Canal University, Ismailia, Egypt

<sup>3</sup>Pediatrics Department, Faculty of Medicine, Suez Canal University, Ismailia, Egypt,

<sup>4</sup>Department of Pediatric Dentistry, Preventive Dentistry and Dental Public Health, Faculty of Dentistry, Aswan University, Aswan, Egypt

**\*Correspondence: Wedad M. Nageeb**, Department of Medical Microbiology and Immunology, Faculty of Medicine, Suez Canal University, Ismailia, Egypt

E-mail: [wedad\\_saleh@med.suez.edu.eg](mailto:wedad_saleh@med.suez.edu.eg)

**Supplementary Figure 1: Microscopic picture of *Candida albicans***

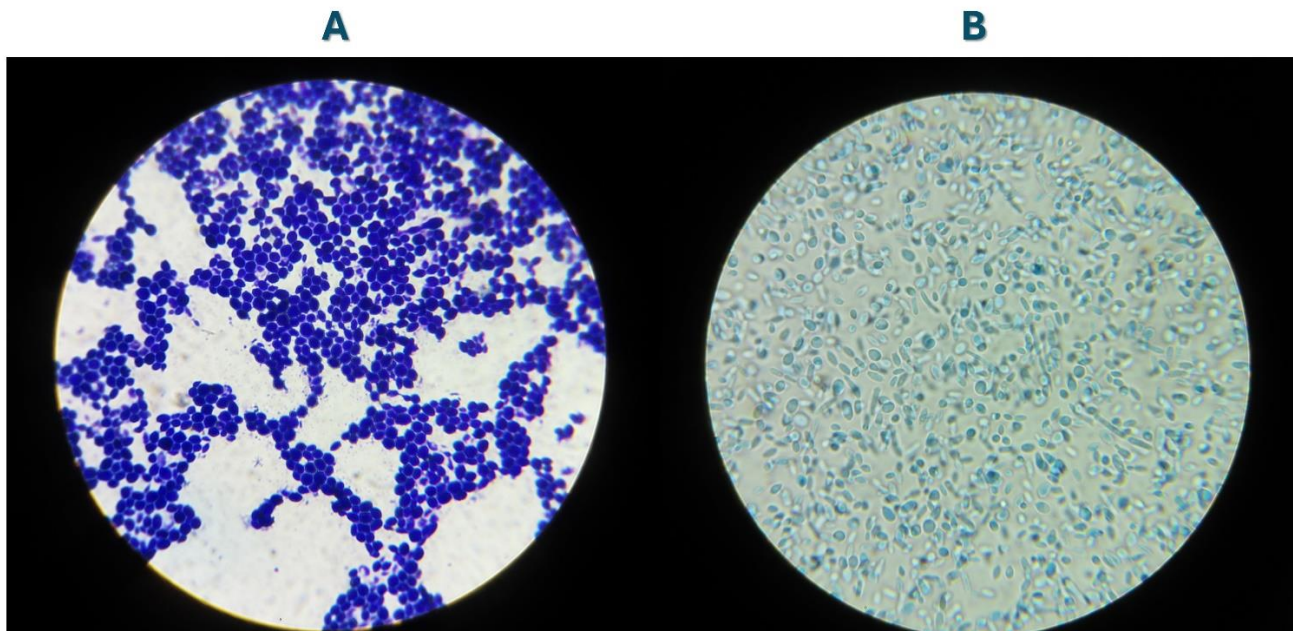

(A) *Candida albicans* morphology at 100x magnification using crystal violet stain showing round to oval large cells retaining the CV stain. (B) *Candida albicans* morphology at 100x magnification using lactophenol cotton blue showing pleomorphic cells with larger blastoconidia 4-6 um with pseudohyphae.

**Supplementary Figure 2: Microscopic picture of *Candida dubliniensis***

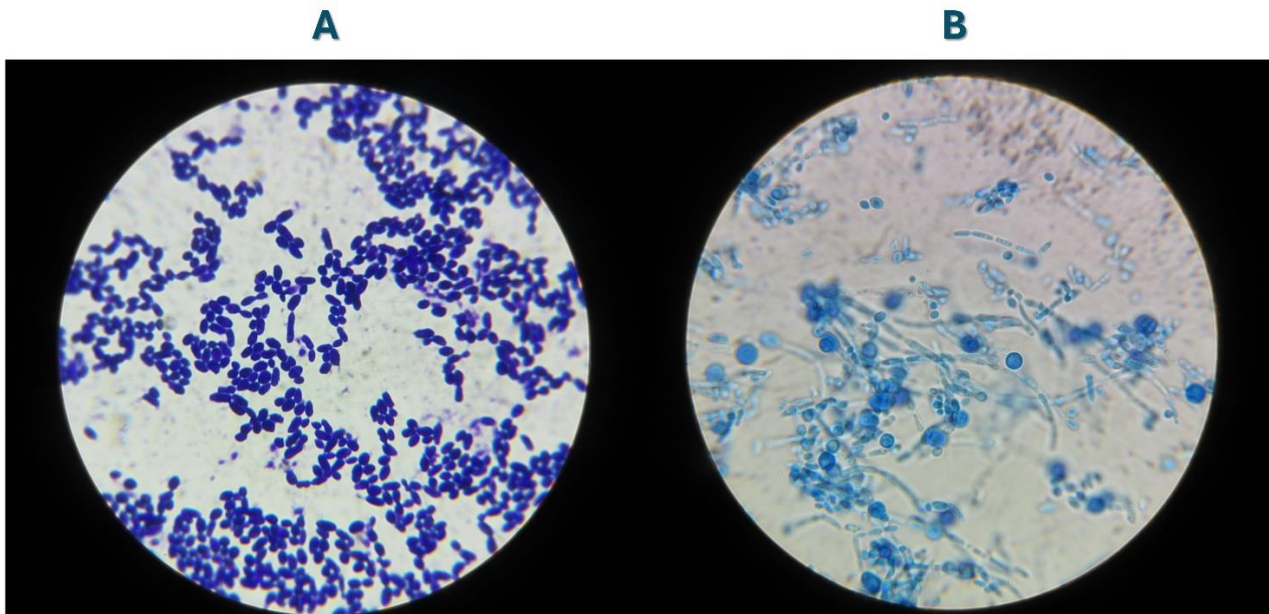

(A) *Candida dubliniensis* morphology at 100x magnification using crystal violet stain showing oval slightly elongated cells with budding. (B) *Candida dubliniensis* morphology at 100x magnification using lactophenol cotton blue showing oval cells with chlamydospore and hyphae.

**Supplementary Figure 3: Serial dilution cultures of *Candida albicans* on CHROMagar Candida medium**

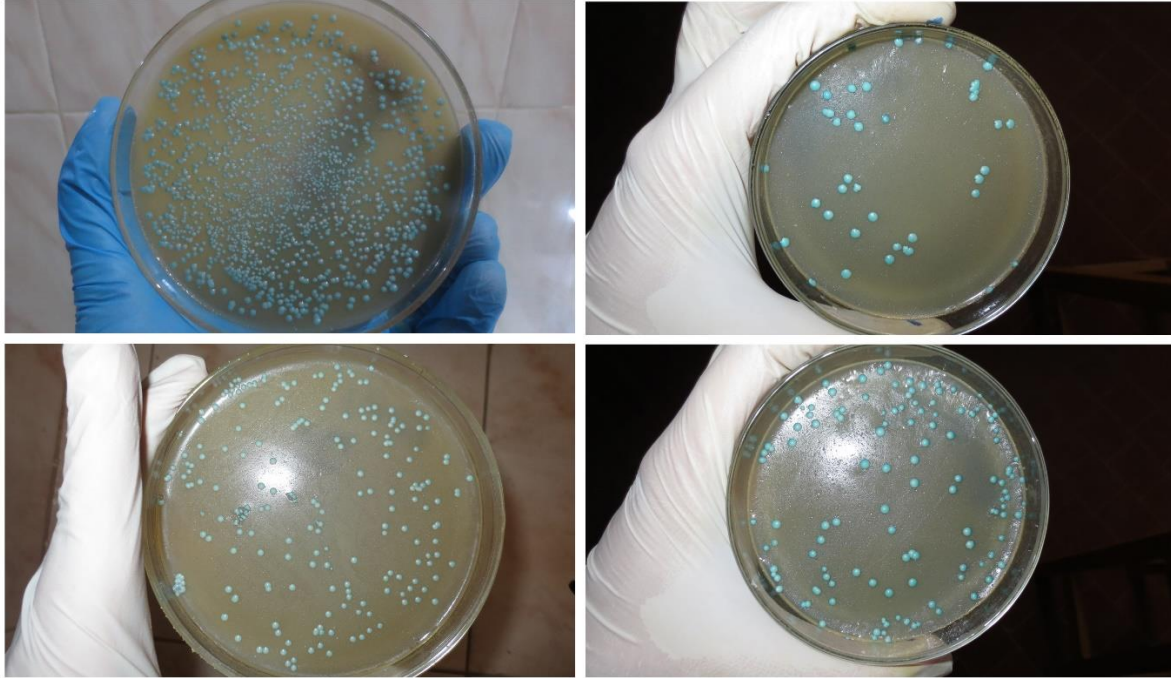

**Supplementary Figure 4: Macroscopic and Microscopic morphology of isolated *C. glabrata***

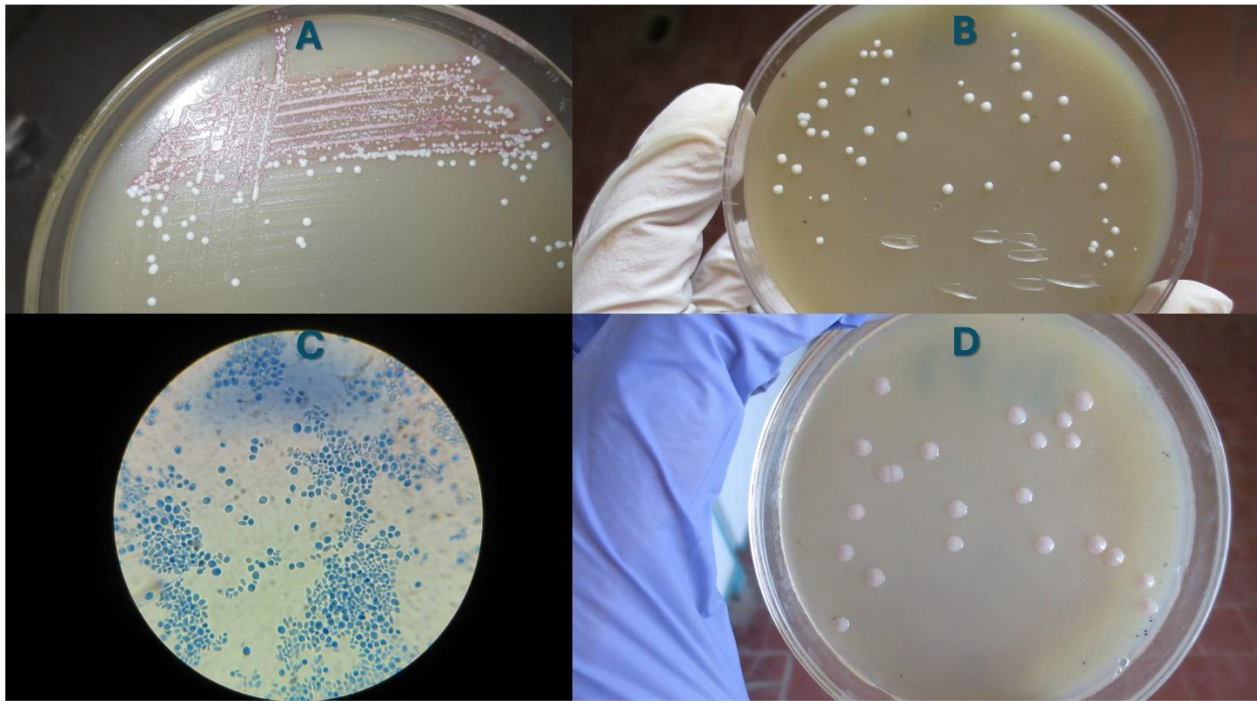

*Candida Glabrata* growth on CHROMagar Candida medium showing white smooth glossy soft colonies, sometimes pinkish (A-B-D). Microscopic morphology of *C. glabrata* at 100x magnification using lactophenol cotton blue showing Spherical to ovoid vegetative cells with small blastoconidia 1-4  $\mu$ m with no pseudohyphae (c)



**Supplementary Figure 5: Macroscopic and Microscopic morphology of isolated *C. Krusei***

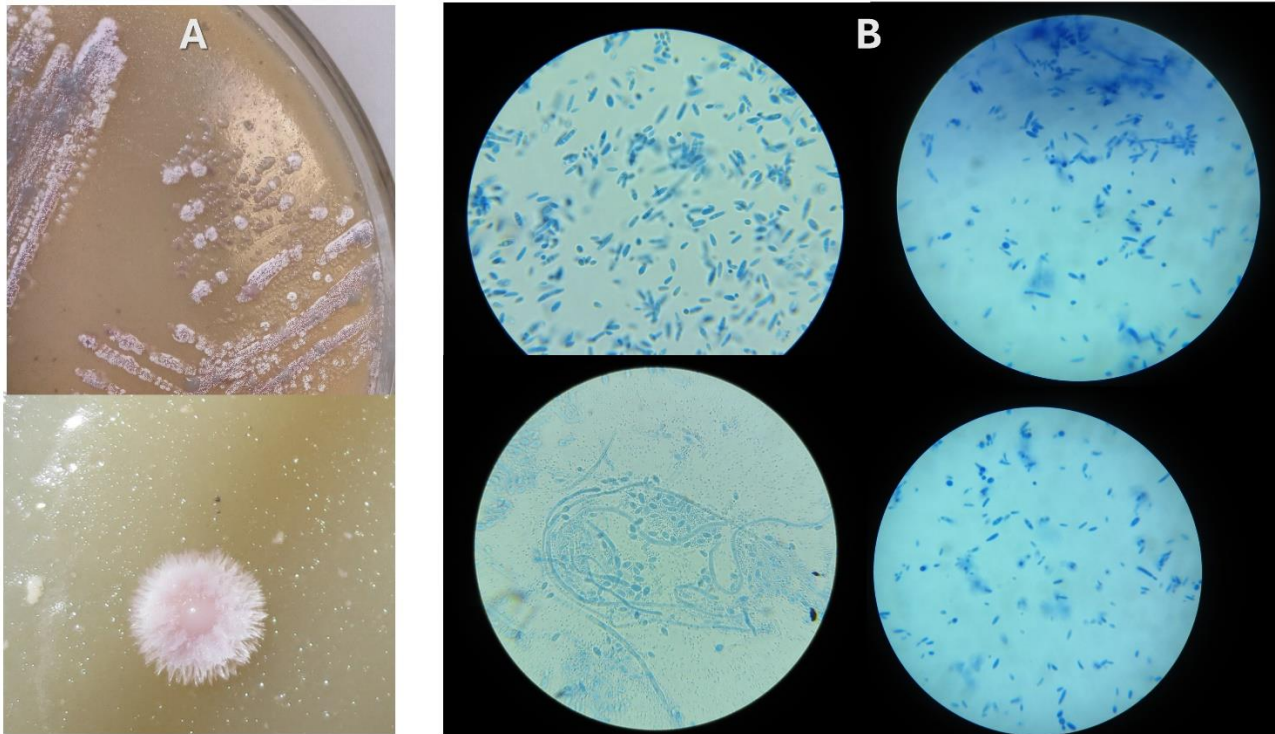

(A) Pale Pink rough fuzzy spreading broad colonies of *C. krusei* on CHROMagar Candida medium. (B) Microscopic morphology of *C. glabrata* at 100x magnification using lactophenol cotton blue showing small elongated to ovoid yeast cells with elongated blastoconidia resembling long grain rice and pseudohyphae.

**Supplementary Figure 6: Macroscopic and Microscopic morphology of isolated *C. parapsilosis***

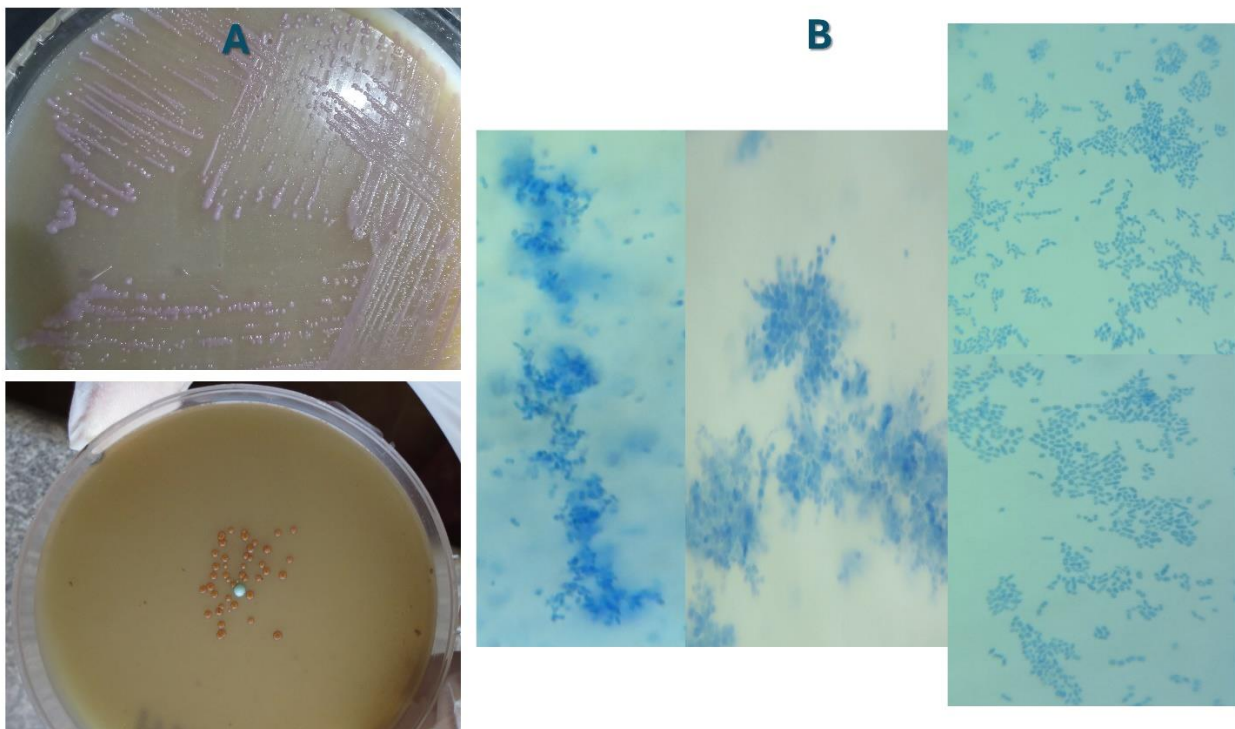

(A) Small pink to orange colonies of *C. parapsilosis* on CHROMagar Candida medium. (B) Microscopic morphology of *C. parapsilosis* at 100x magnification using lactophenol cotton blue showing small scattered blastoconidia (2.5–4µm) sometimes with spider radiating appearance

**Supplementary Figure 7: Morphology of different isolated Candida species on Candida CHROMagar**

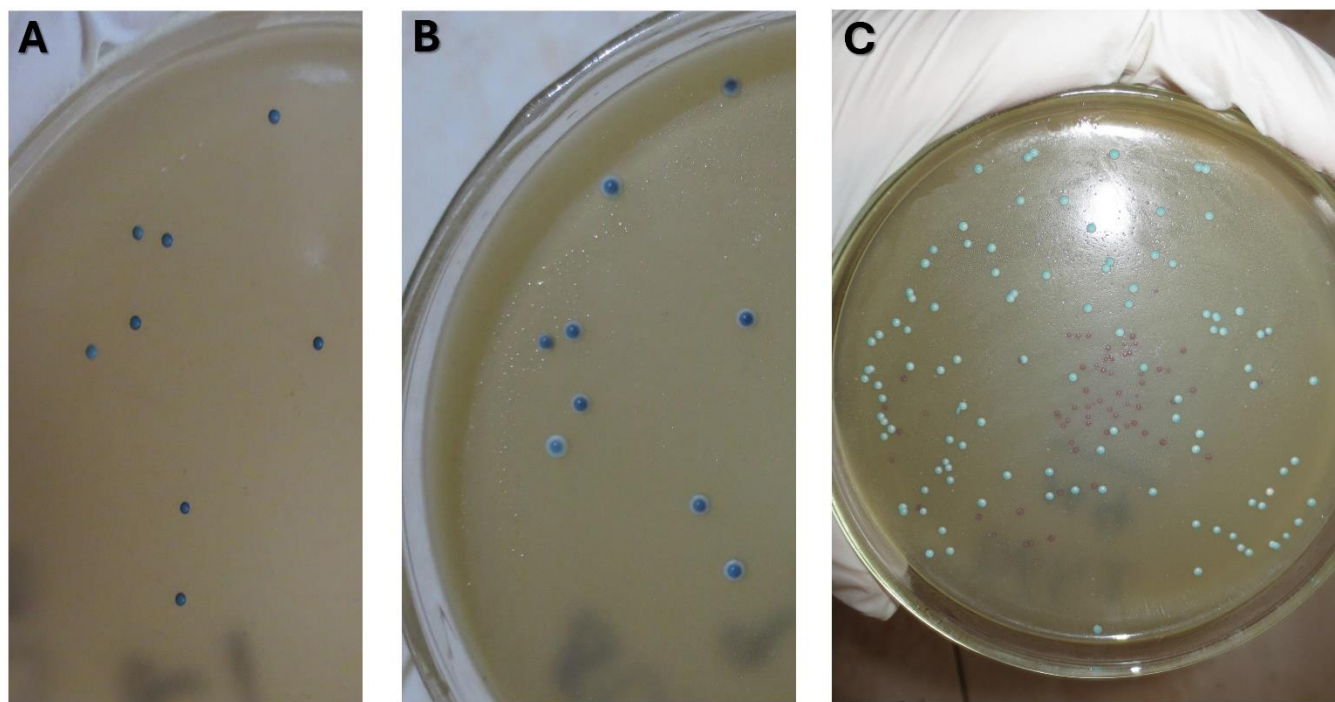

*Candida tropicalis* colonies on CHROMagar Candida medium showing violet to dark metallic blue colonies with paler edges (A-B).

Mixed Candida growth on CHROMagar Candida medium showing *C. albicans* and *C. parapsilosis* (C).

**Supplementary Figure 8: Serial dilution cultures of *Lactobacilli* on Lactobacillus MRS agar**

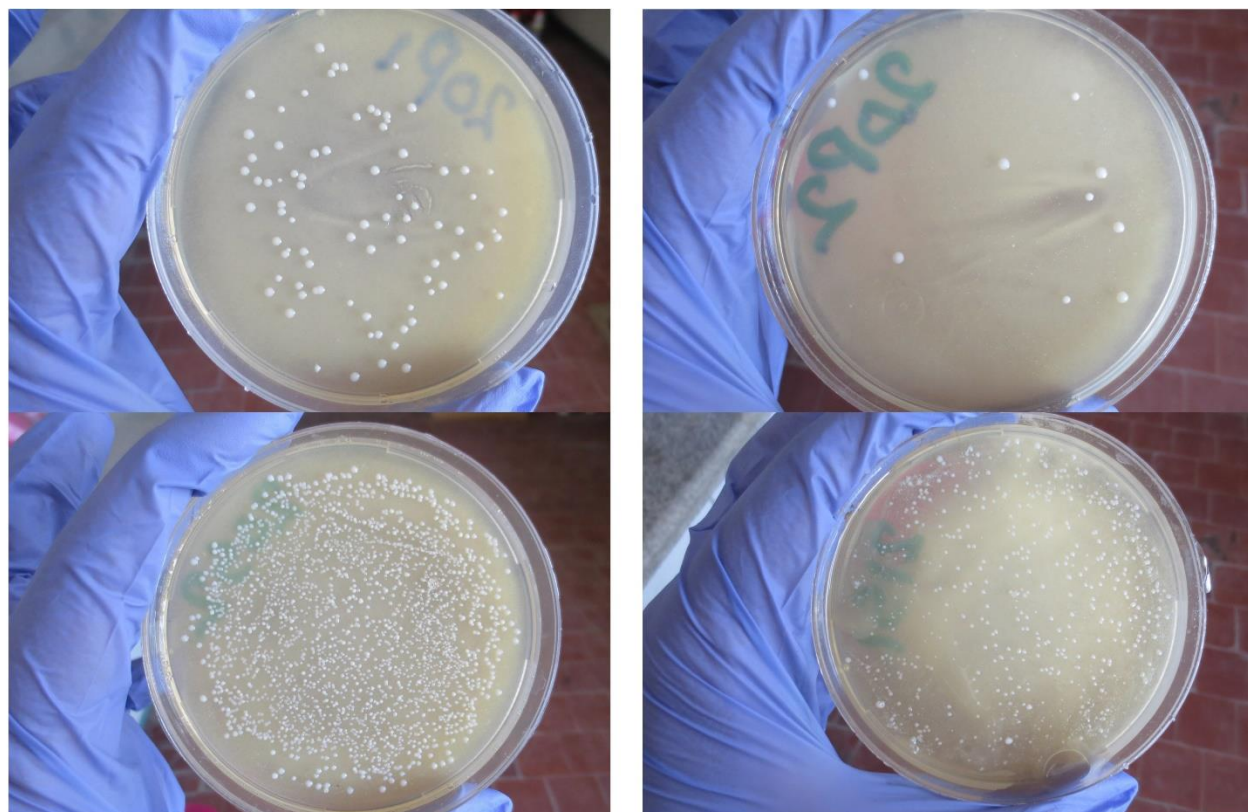



**Supplementary Figure 9: Microscopic and Macroscopic morphology of isolated *Lactobacilli***

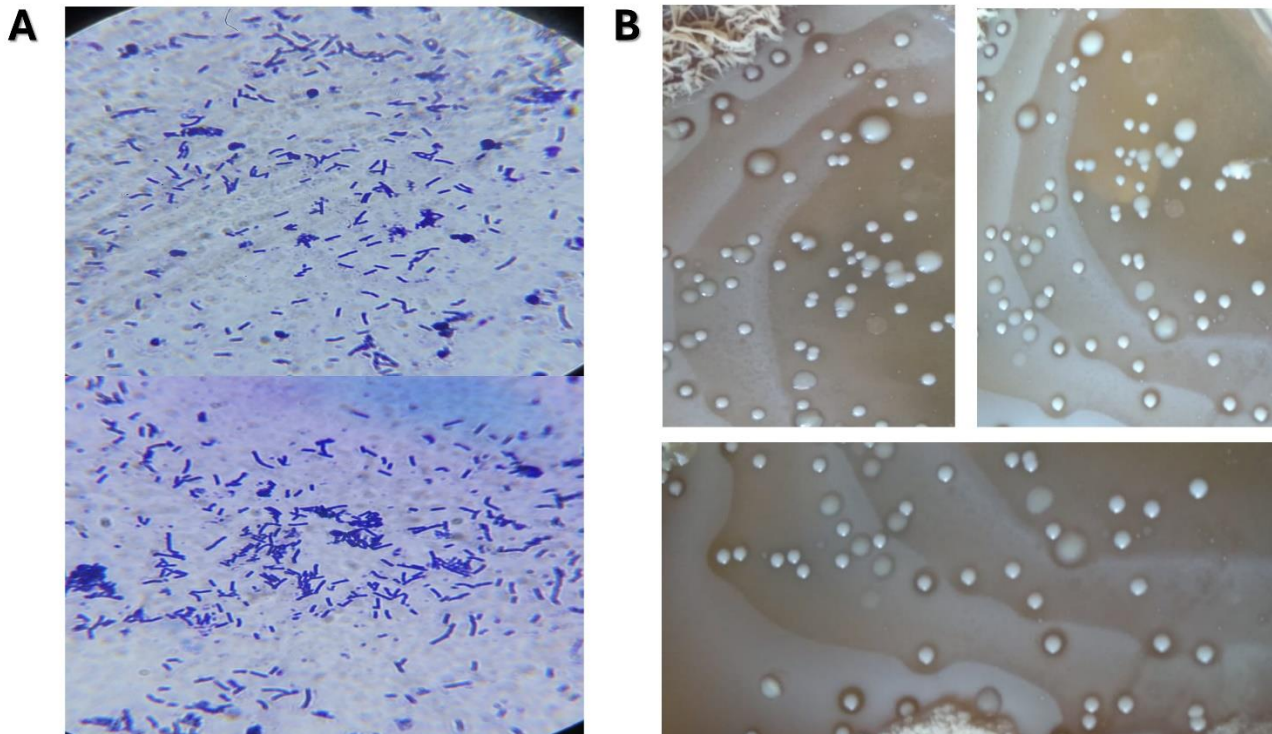

(A) Microscopic picture of *lactobacilli* showing Gram positive rods stained by crystal violet. (B) Colonies of *Lactobacilli* growing on MRS agar supplemented with 1.5%  $\text{CaCO}_3$  showing clear zones of inhibition. *Lactobacillus* colonies were identified as milky white elevated moist circular colonies with clear zones

**Supplementary Figure 10: Macroscopic and Microscopic morphology of Mutans Streptococci**

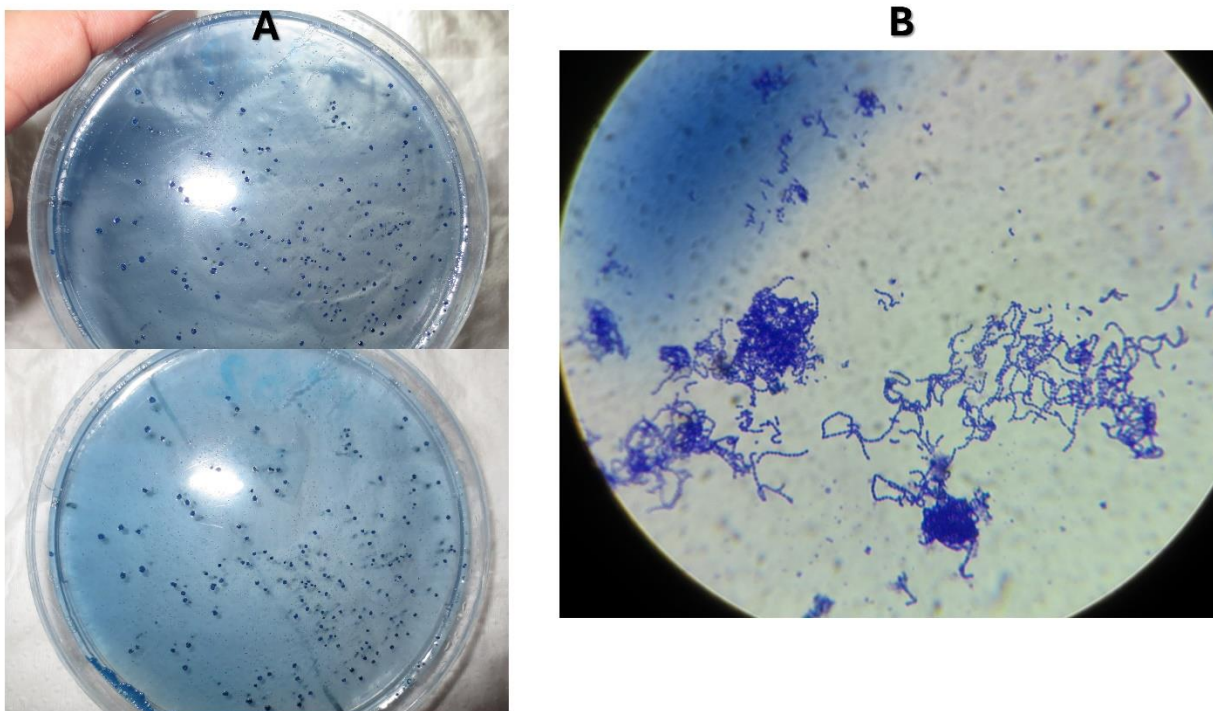

(A) Spread plate culture for enumeration of Mutans Streptococci on modified Mitis Salivarius agar. (B) Microscopic morphology of *Streptococcus mutans* showing Gram positive colonies arranged in chains.
